# Supplementary material for: Outcomes and biomarker analyses among patients with COVID-19 treated with interleukin 6 (IL-6) receptor antagonist sarilumab at a single institution in Italy
Source: PubMed Central journal article supplement — J Immunother Cancer. 2020 Aug 11;8(2):e001089. doi: 10.1136/jitc-2020-001089 (PMC7418768; doi:10.1136/jitc-2020-001089), 2020-08-11

# Supplementary figure 2

Average values and individualized data for hematologic and inflammatory parameters in sarilumab-treated patients

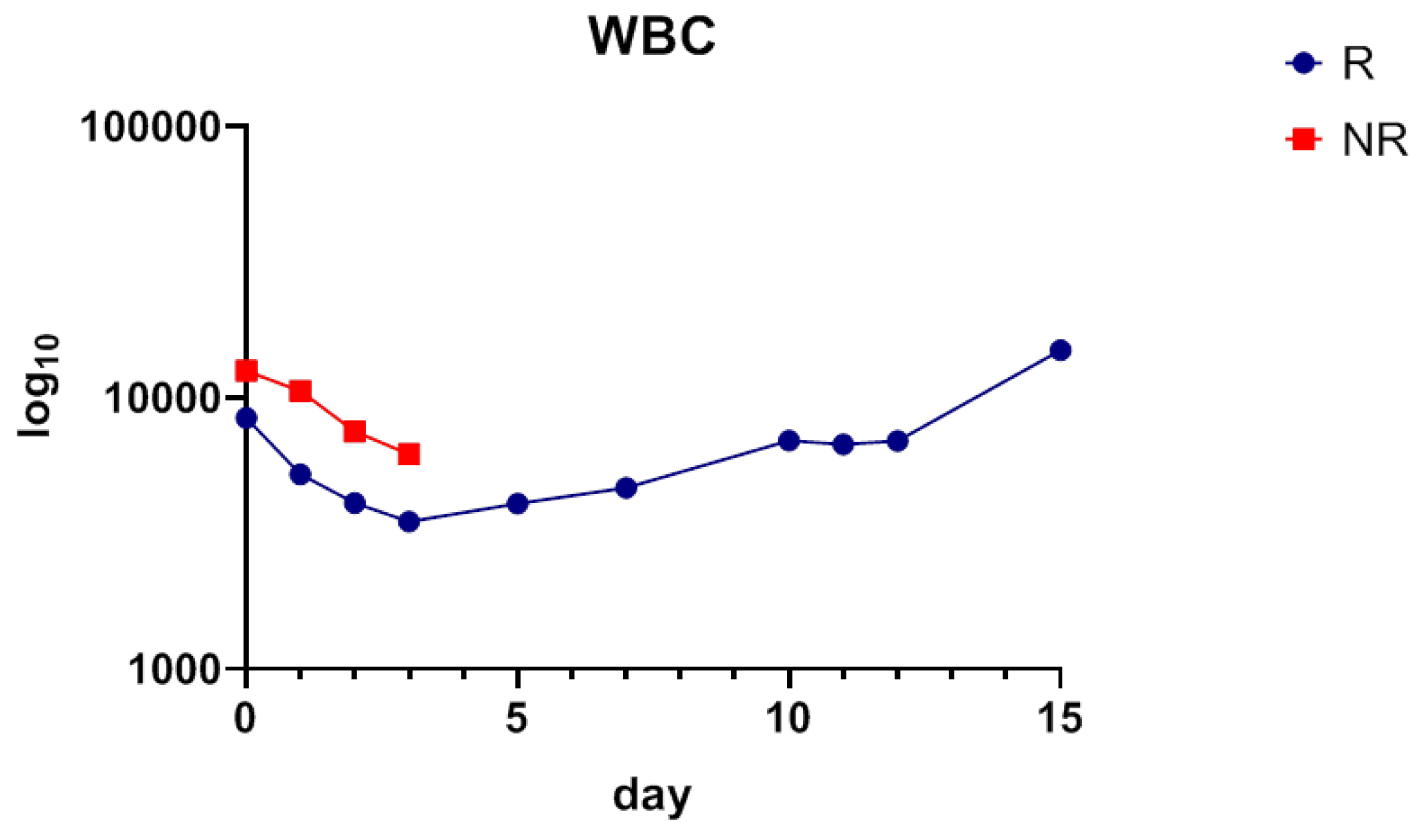

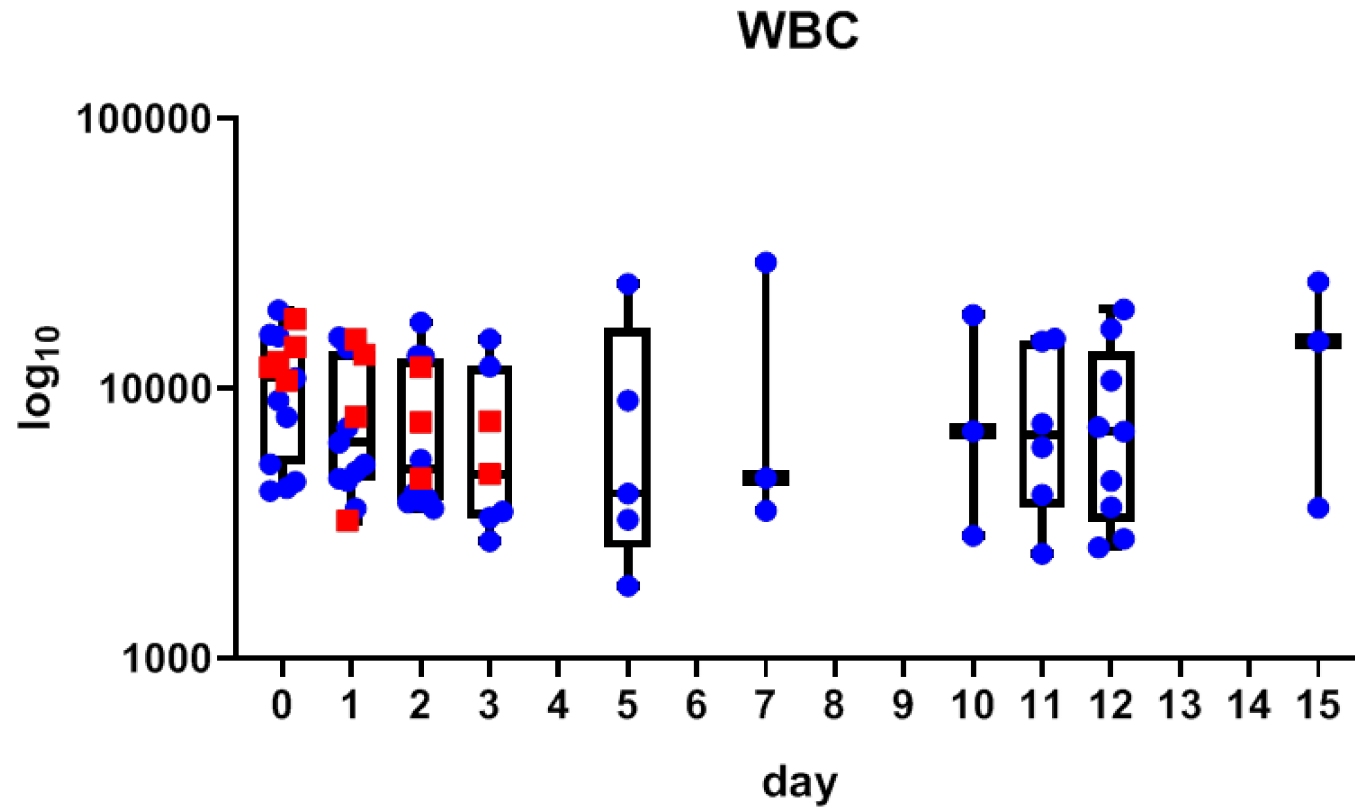

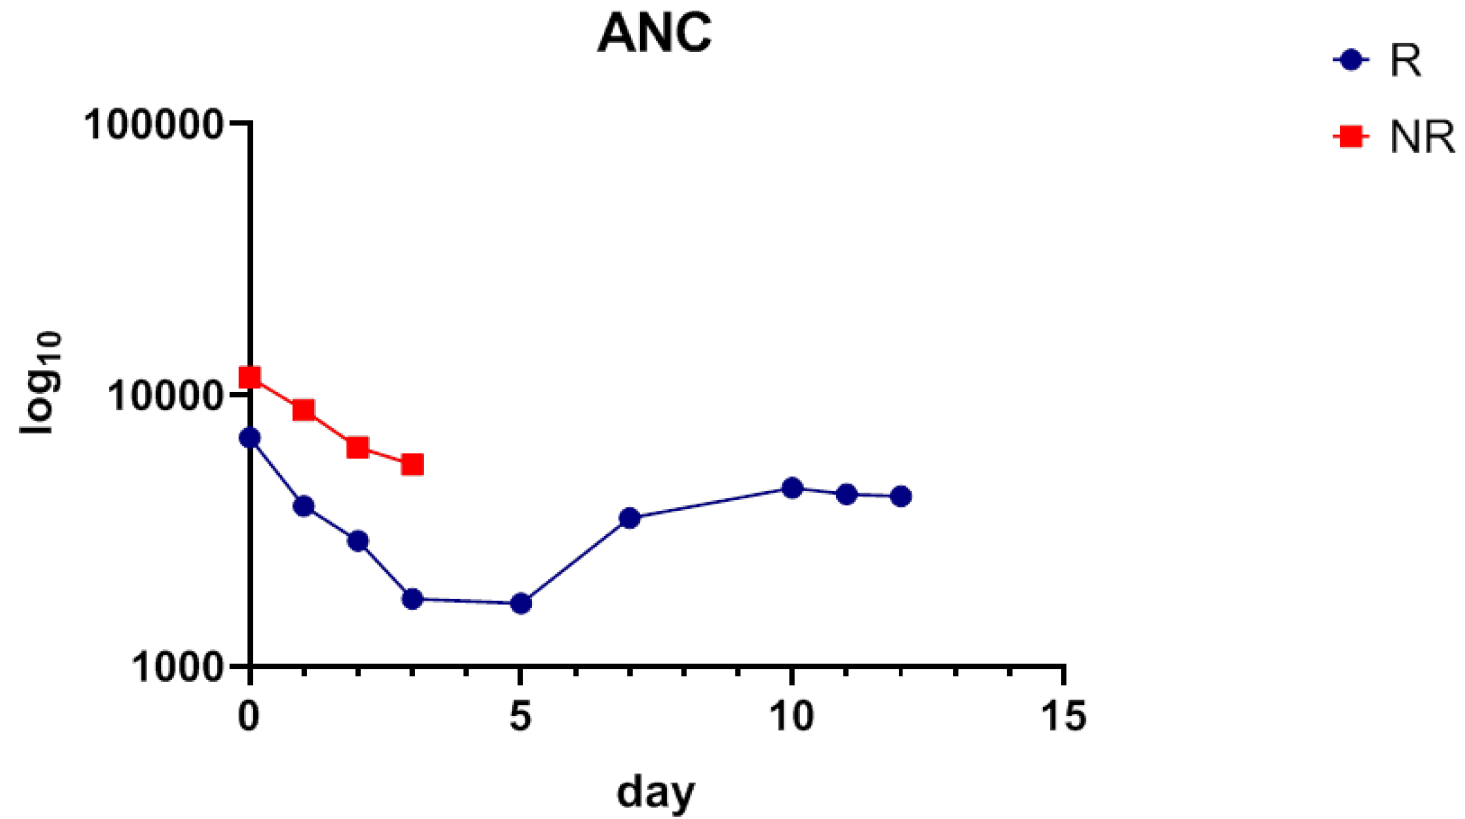

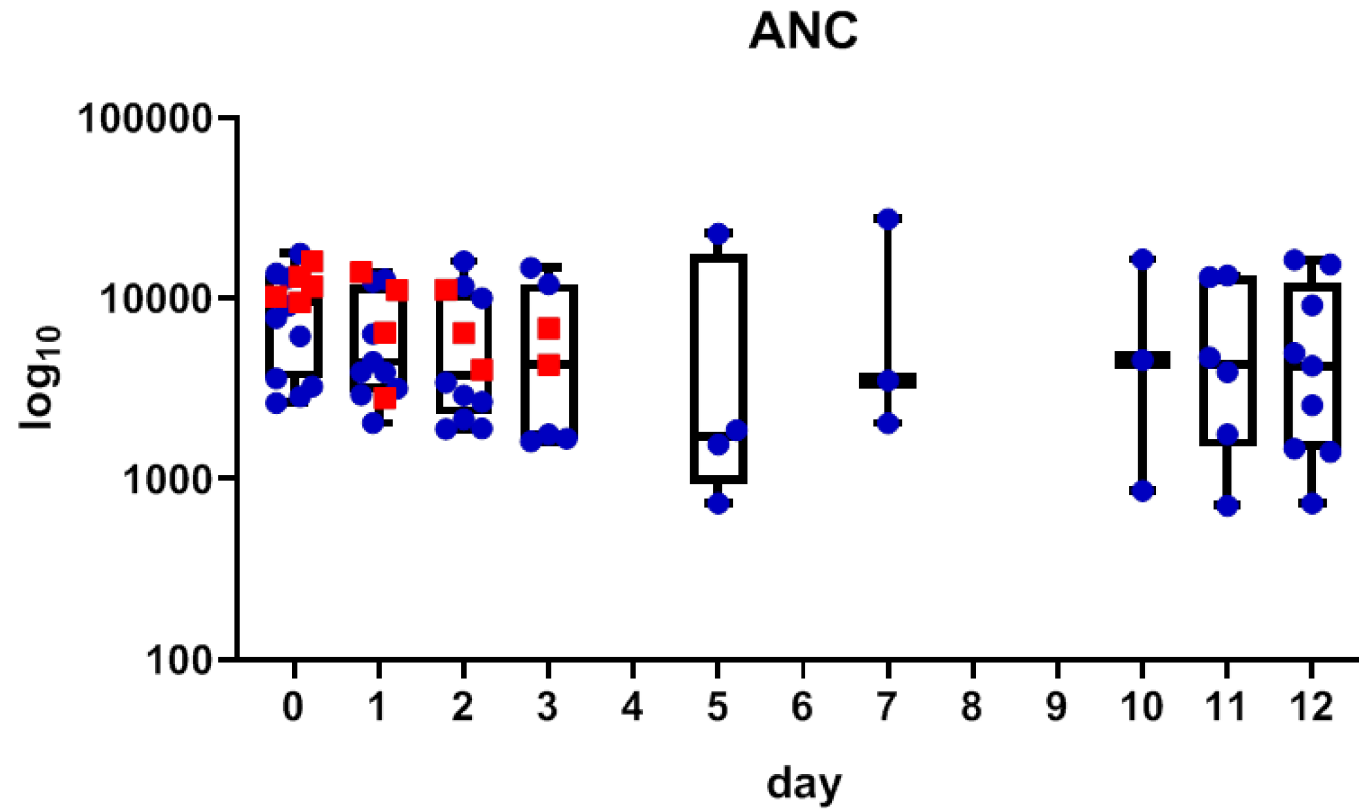

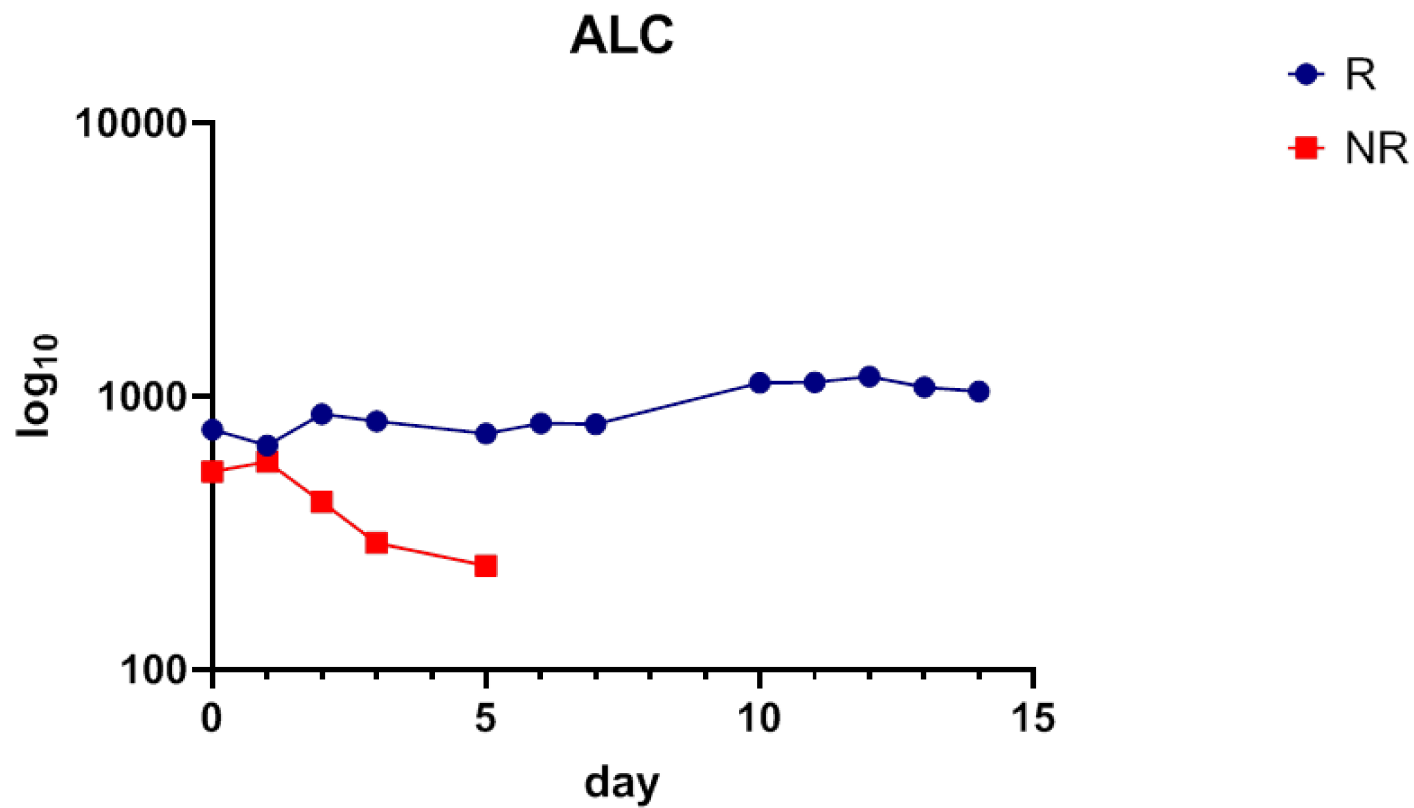

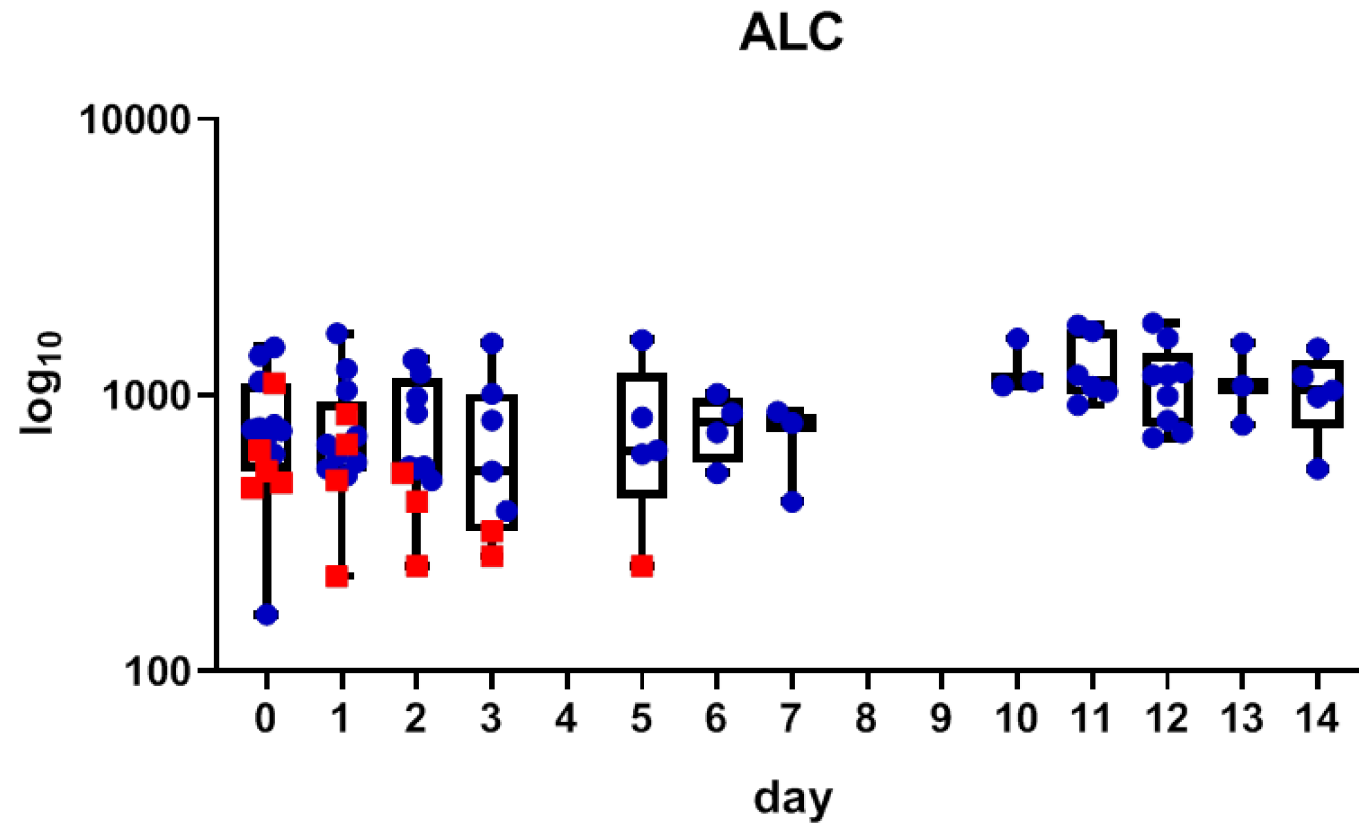

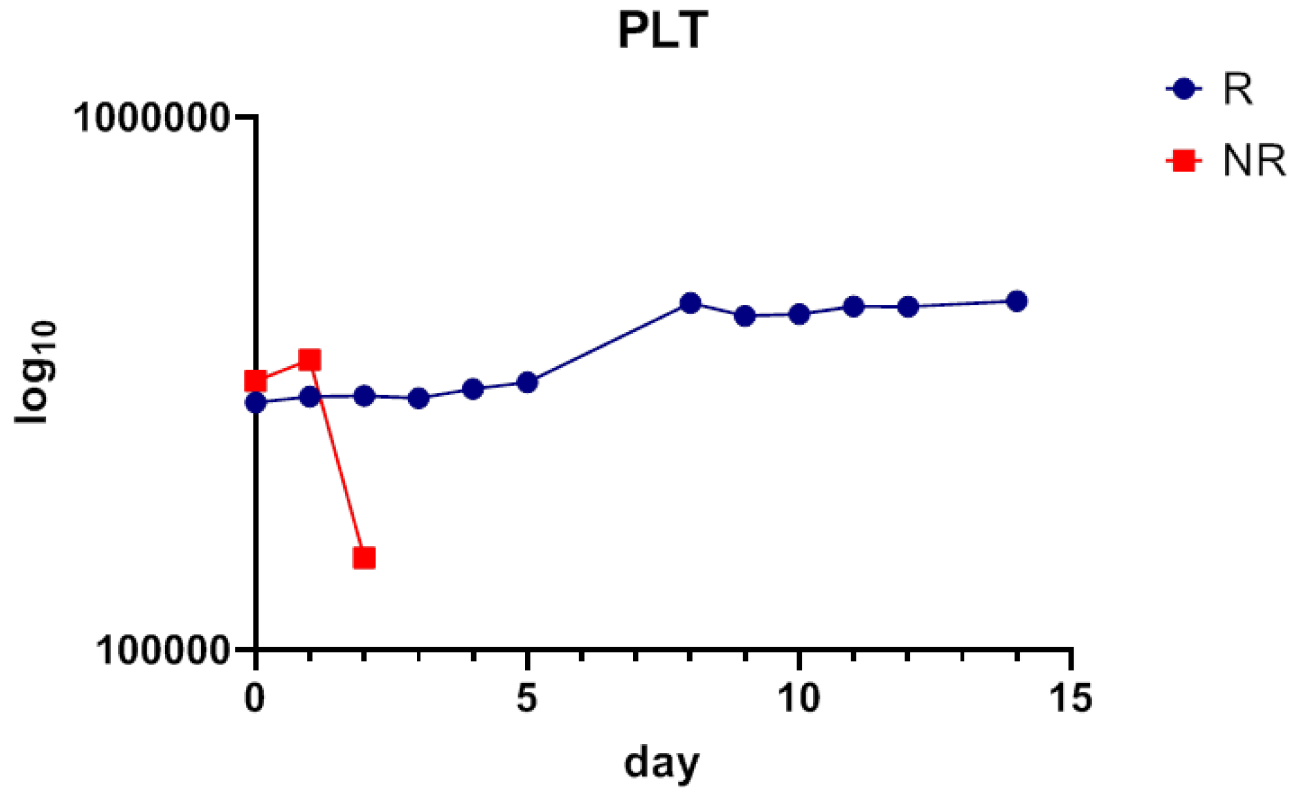



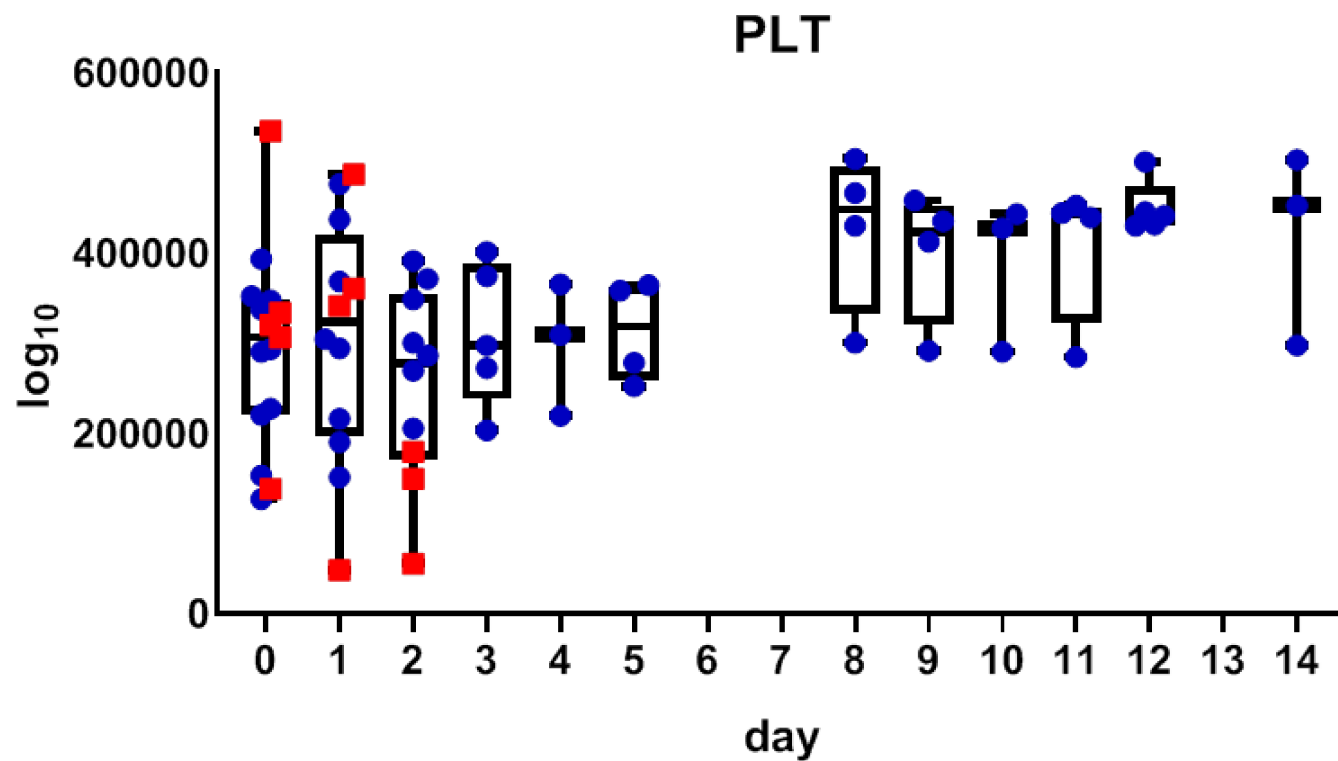

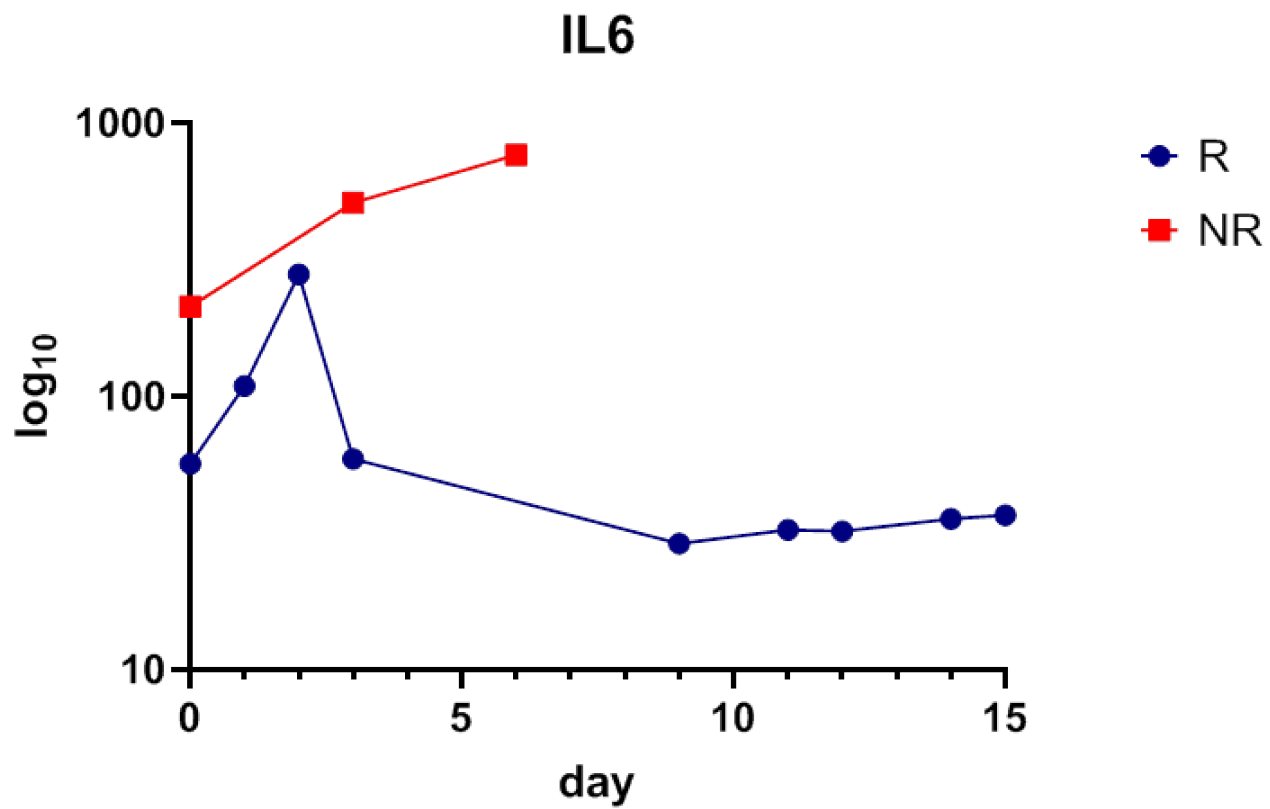

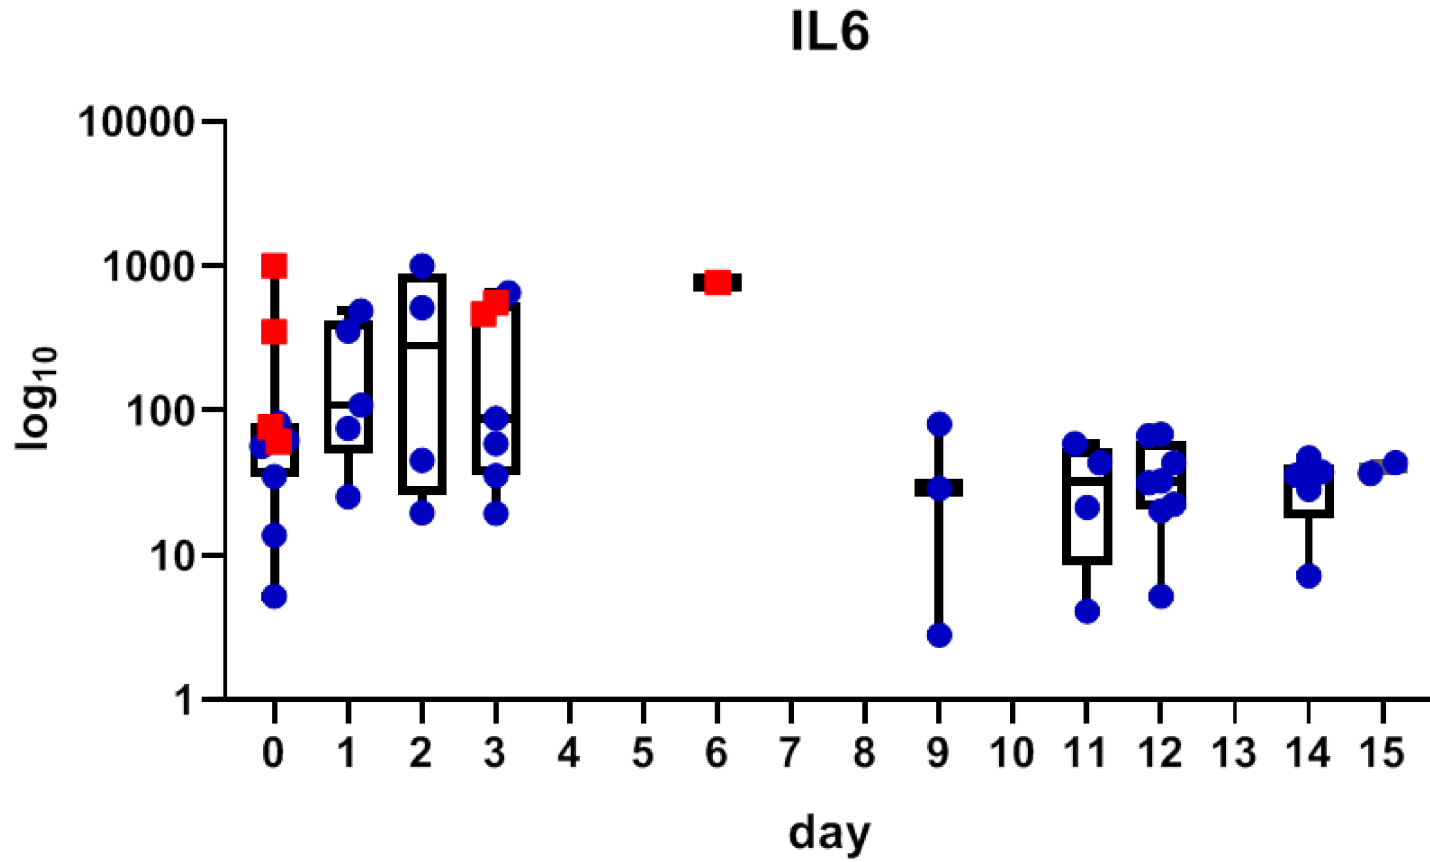

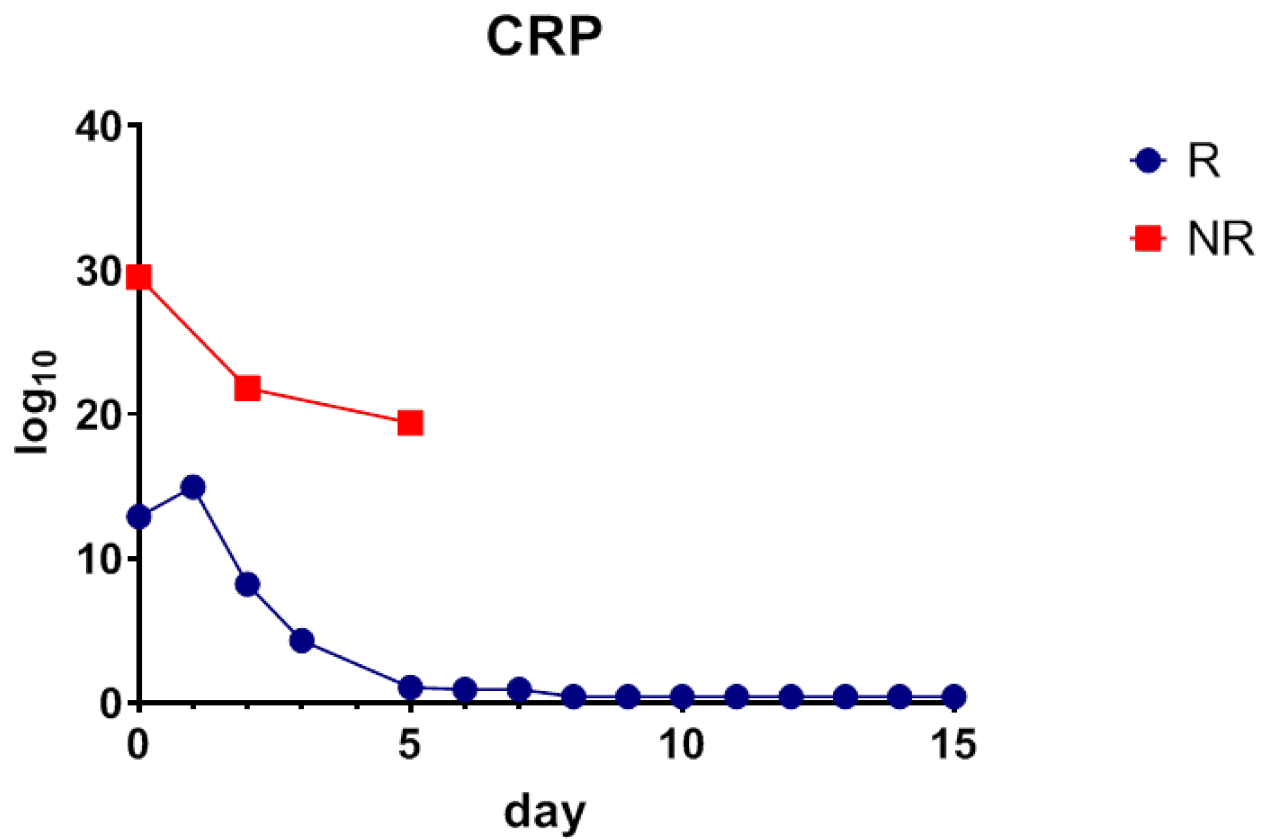

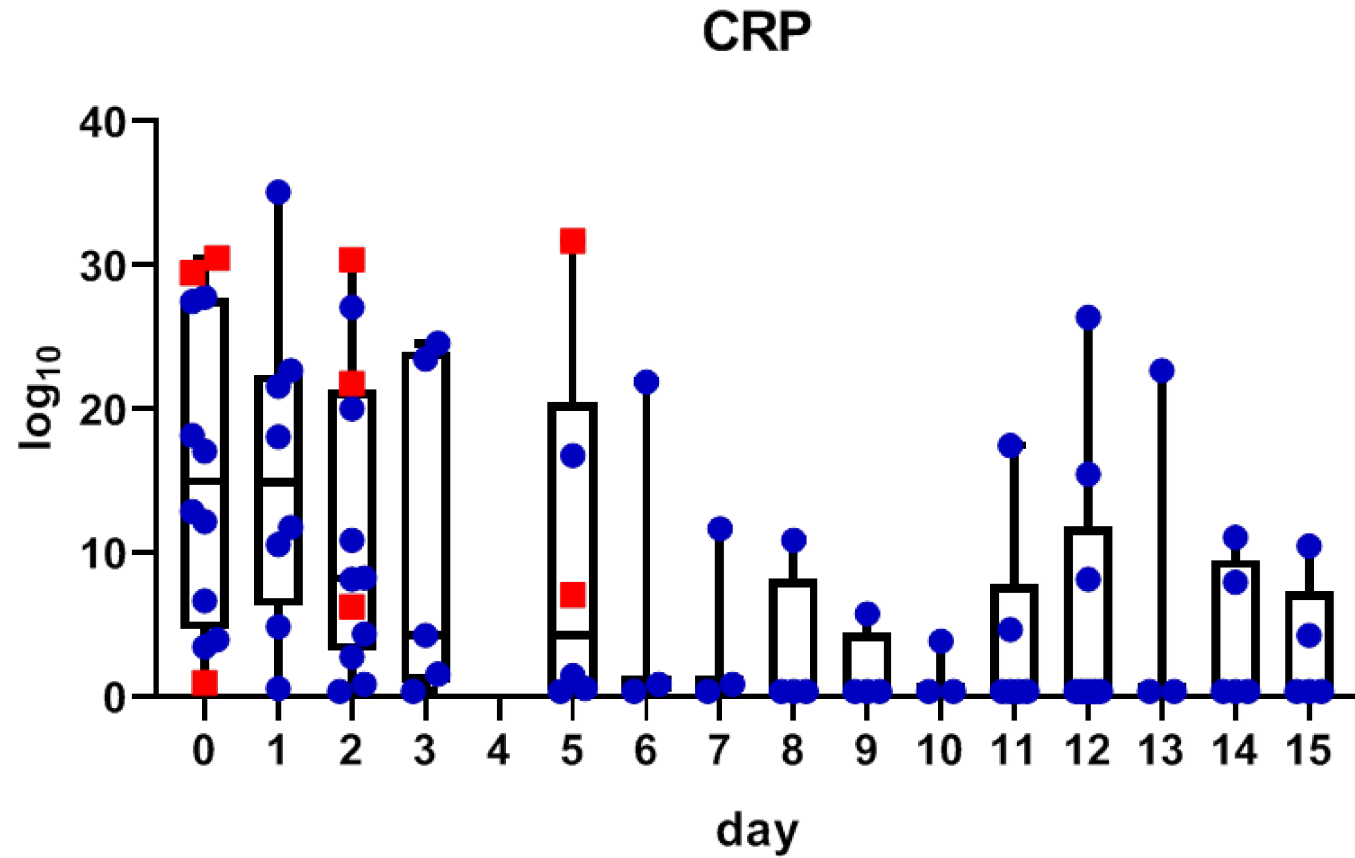

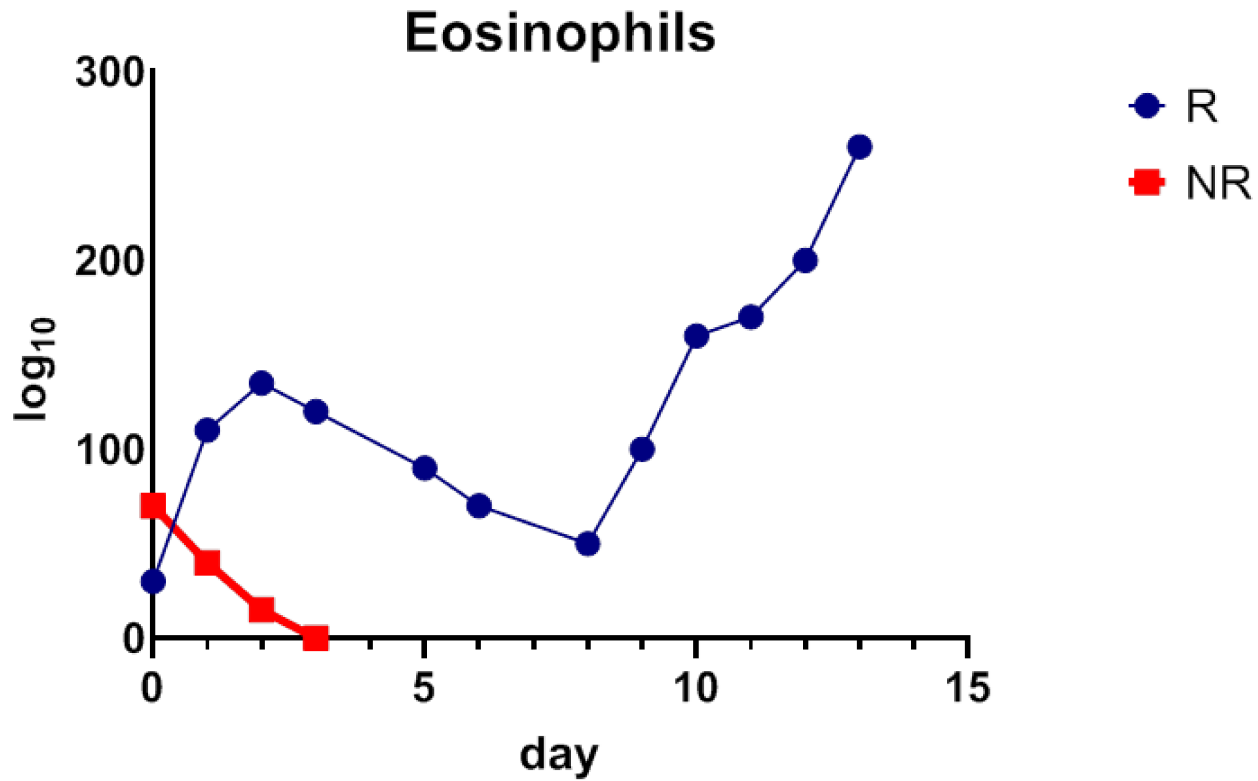

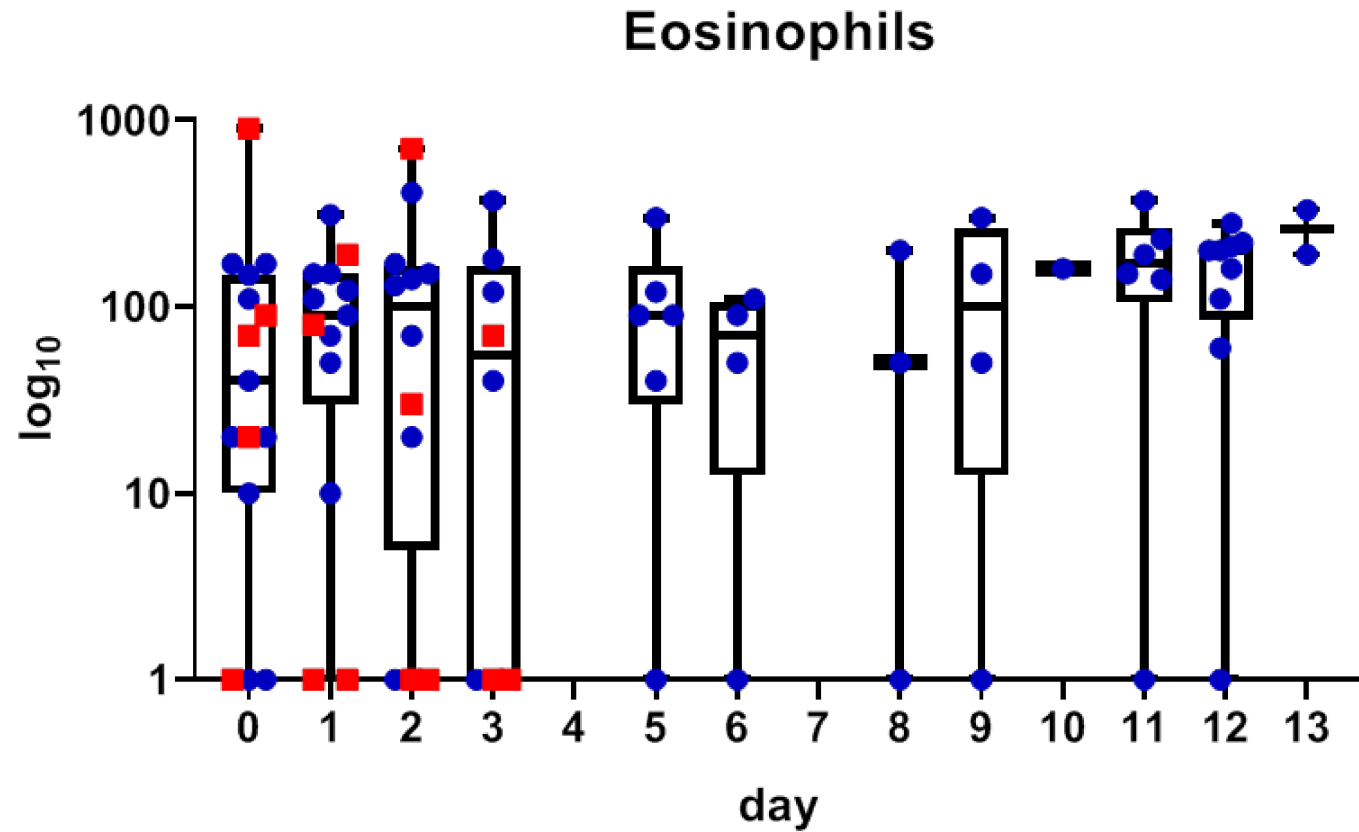

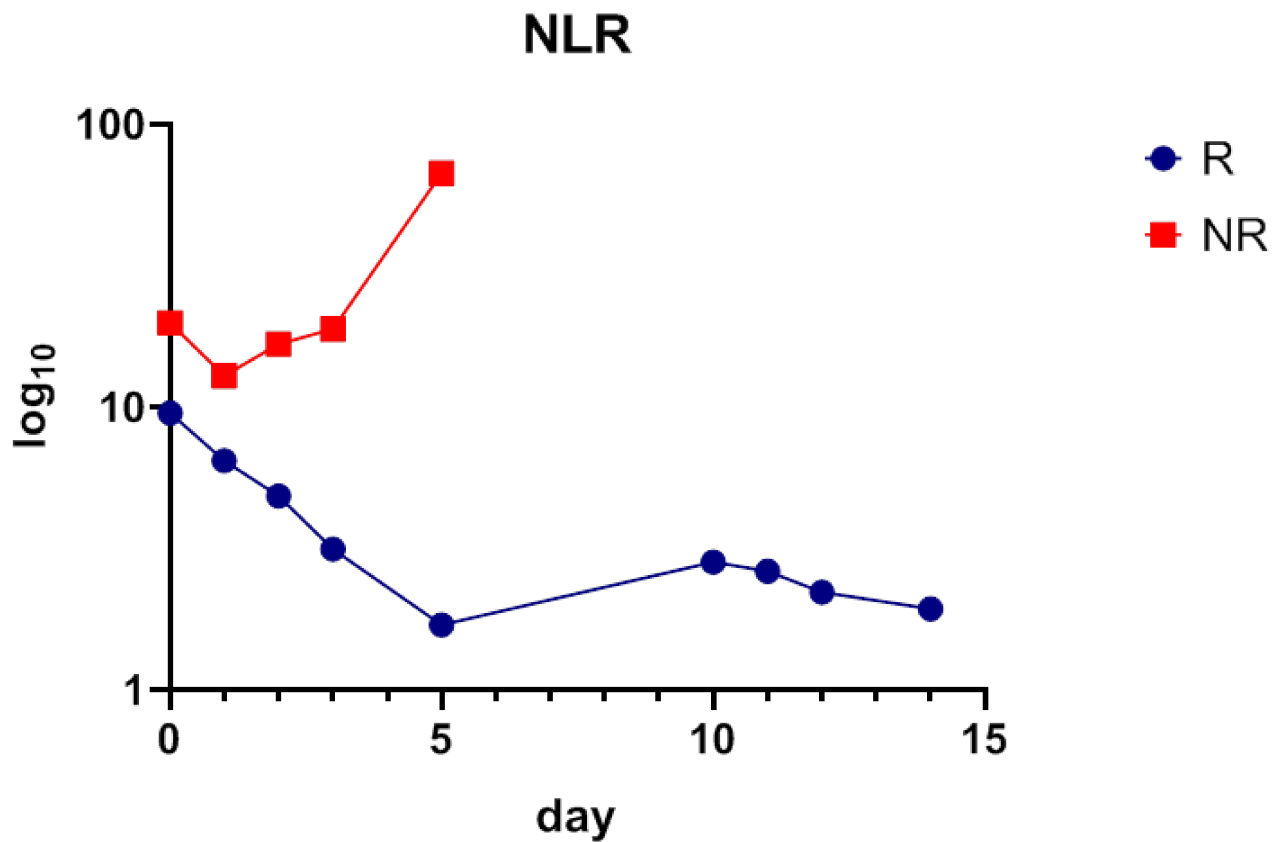



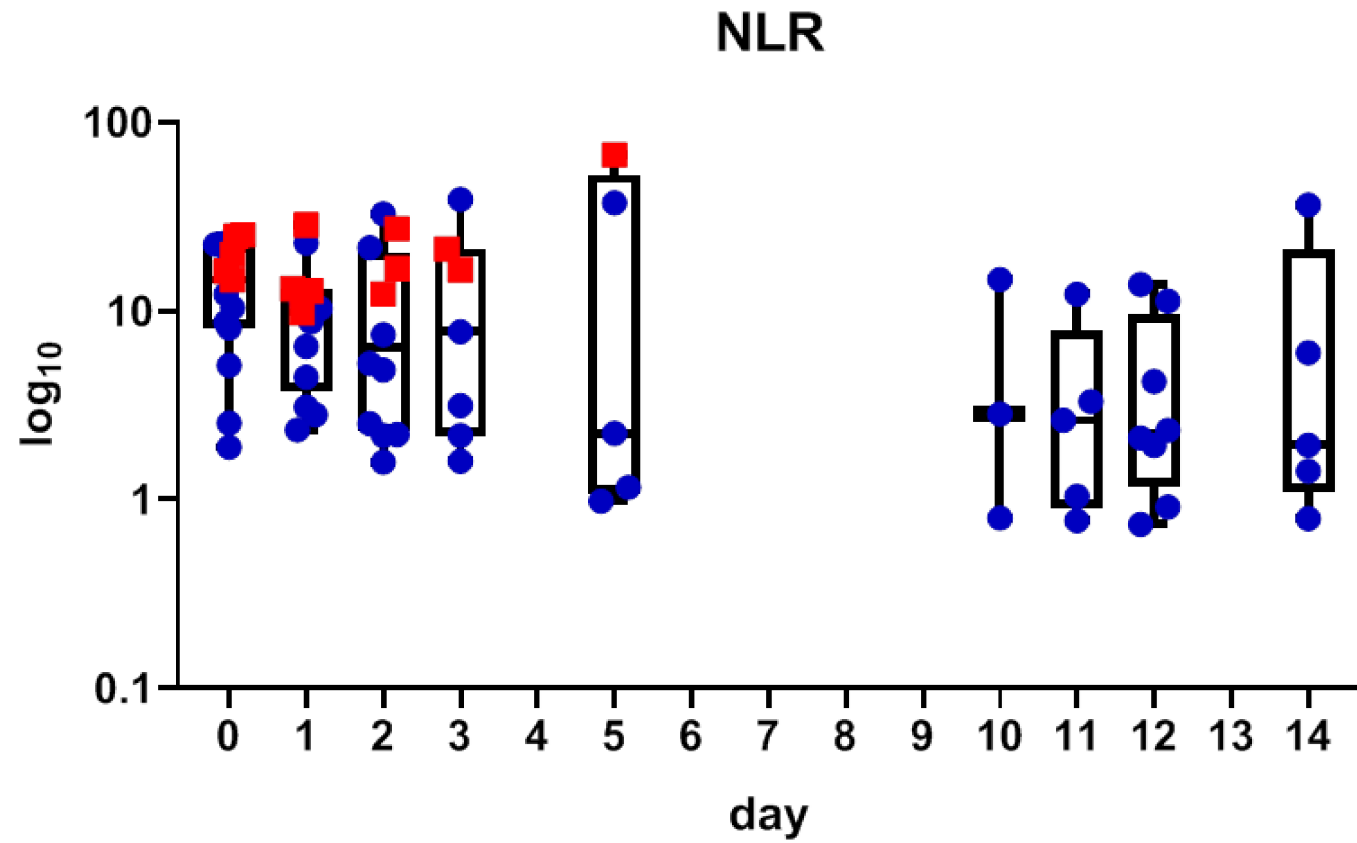

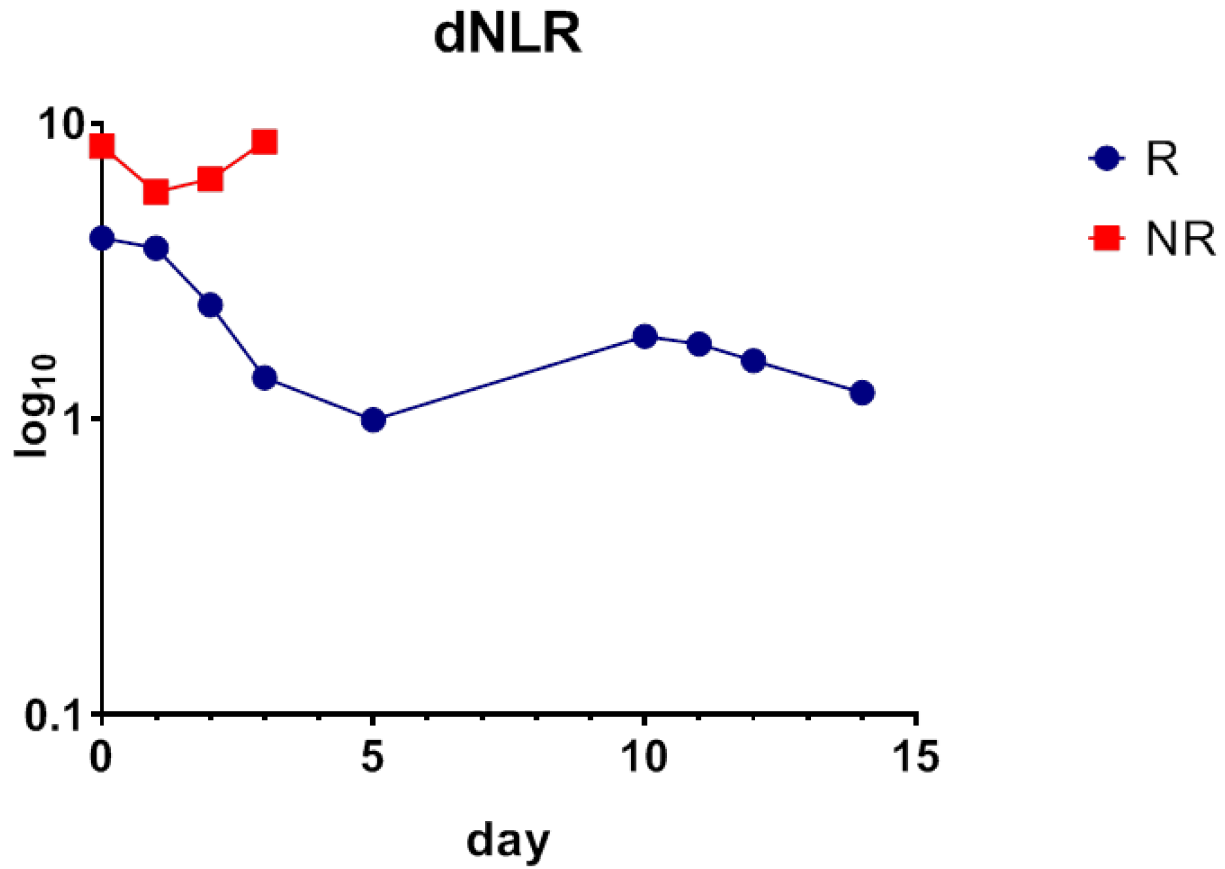

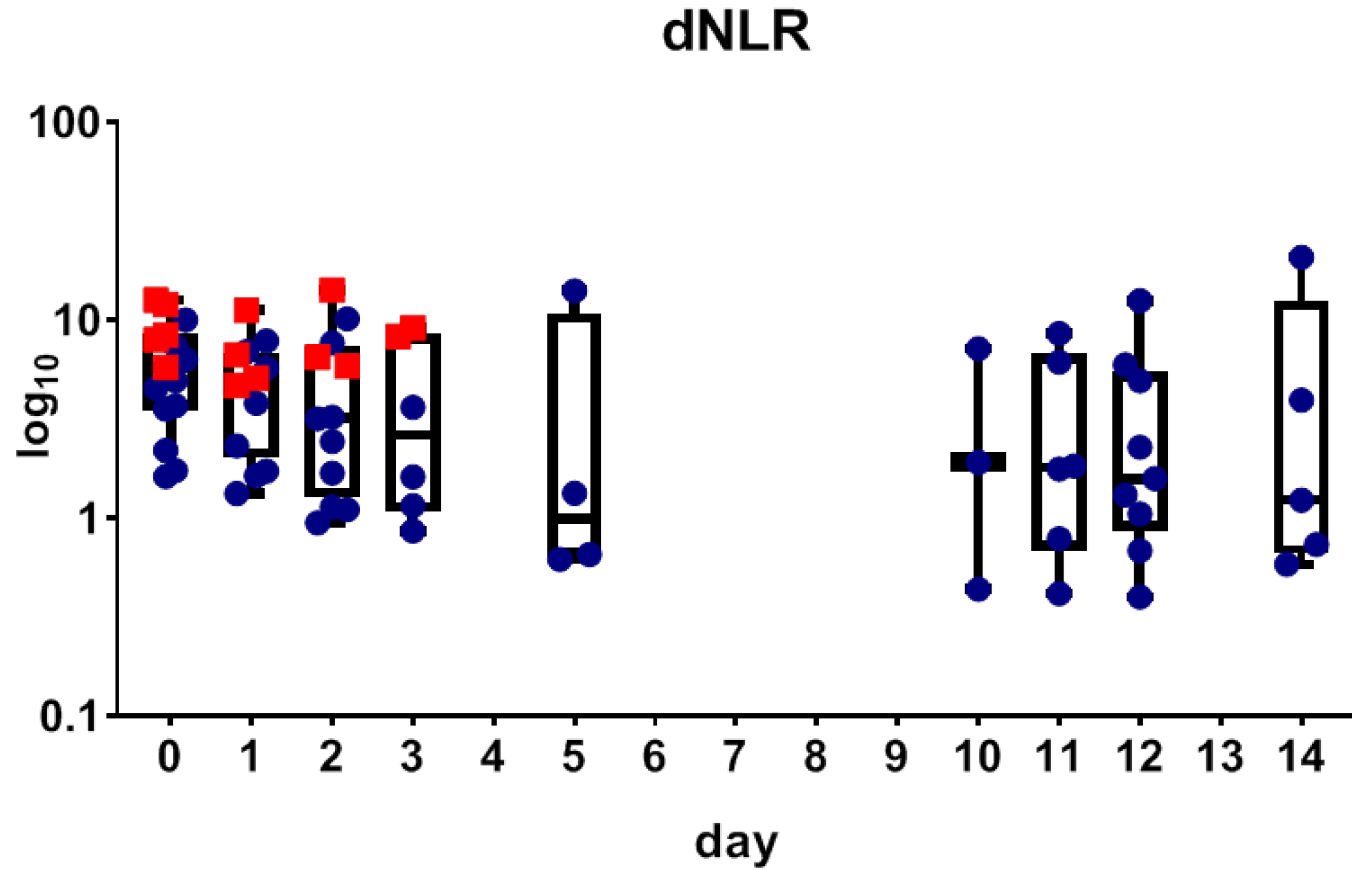

## D-dimer

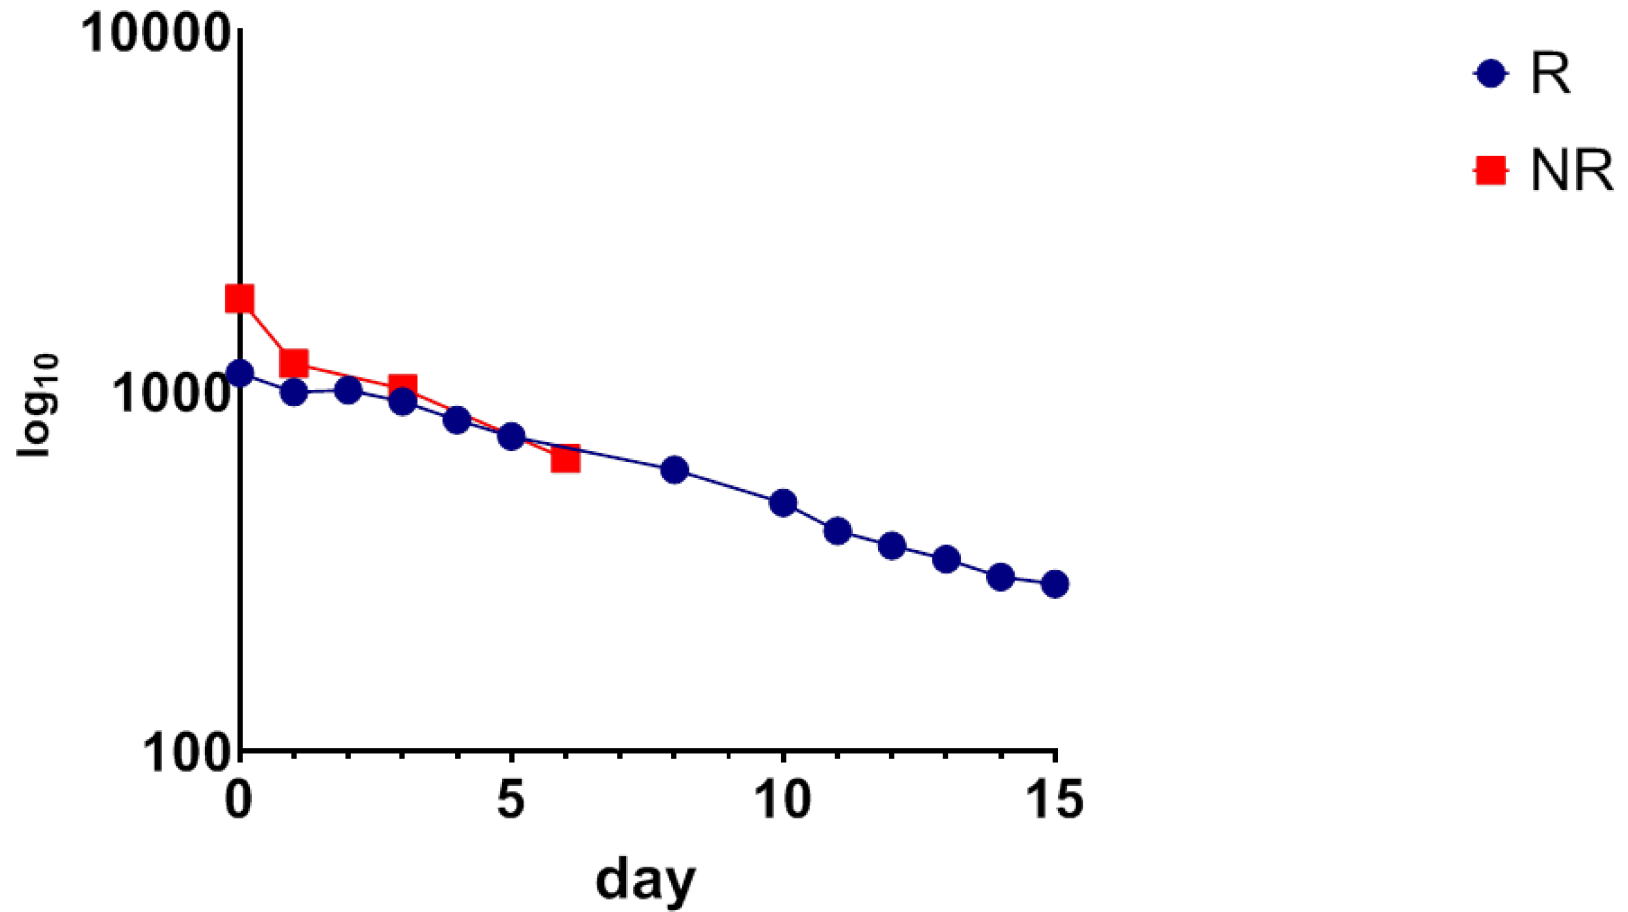

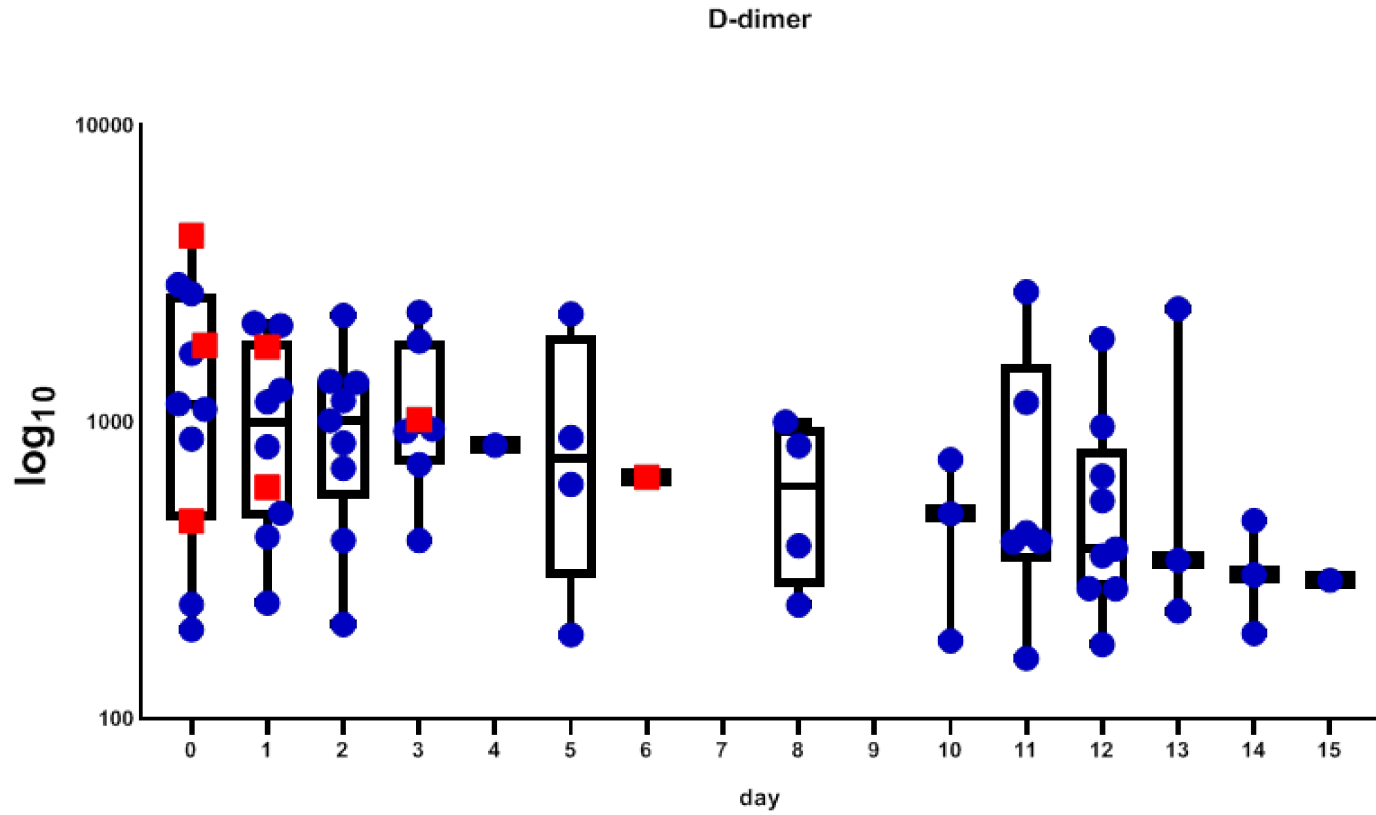

Supplement: jitc-2020-001089supp002.pdf [file jitc-2020-001089supp002.pdf]
